# Supplementary material for: Benzimidazole functionalized covalent triazine frameworks for CO2capture
Source: Royal Society of Chemistry journal article supplement (doi:10.1039/c6ta05107c), 2016-01-01
Supplement: c6ta05107c1.pdf [file c6ta05107c1.pdf]

*Electronic Supplementary Information for*  
**Benzimidazole functionalized Covalent Triazine Frameworks for CO<sub>2</sub> capture**

Liming Tao<sup>a</sup>, Fang Niu<sup>b</sup>, Chao Wang<sup>a</sup>, Jingang Liu<sup>c</sup>, Tingmei Wang<sup>a</sup> and Qihua

Wang<sup>\*a</sup>

<sup>a</sup> *State Key Laboratory of Solid Lubrication, Lanzhou Institute of Chemical Physics,  
Chinese Academy of Sciences, Lanzhou, Gansu 730000, P.R. China. Fax: 86 0931*

*4968252; Tel: 86 0931 4968252*

<sup>b</sup> *College of Chemistry and Chemical Engineering, Lanzhou University, Lanzhou,  
Gansu 730000, P.R. China. E-mail: niufang@lzu.edu.cn.*

<sup>c</sup> *Laboratory of Advanced Polymer Materials, Institute of Chemistry, Chinese  
Academy of Sciences, Beijing, 100866, P.R. China. E-mail: liujg@iccas.ac.cn*

*Corresponding to: qhwang@licp.cas.cn.*

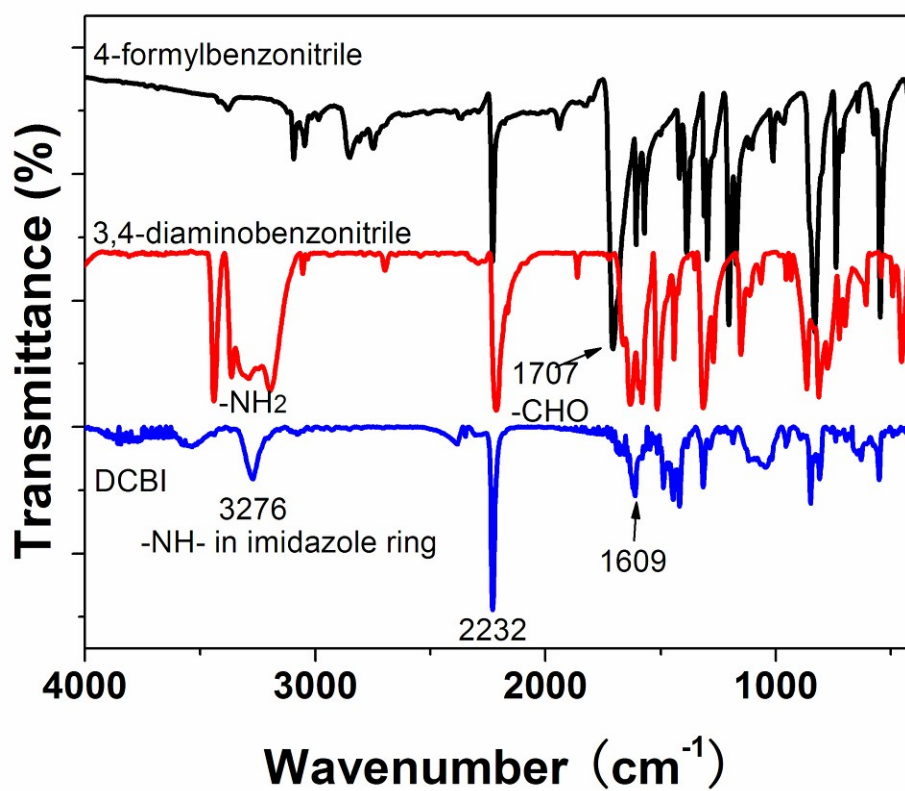

Fig. S1 FT-IR spectra of DCBI and corresponding reactants (KBr pellets)

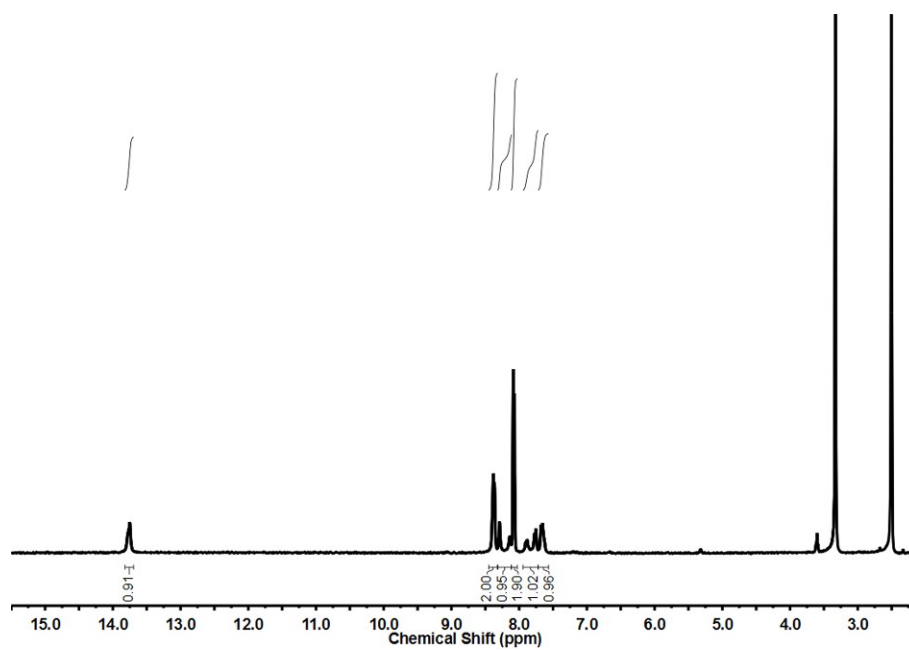

Fig. S2  $^1\text{H}$  NMR spectrum of DCBI ( $\text{DMSO-}d_6$ , 400 MHz)

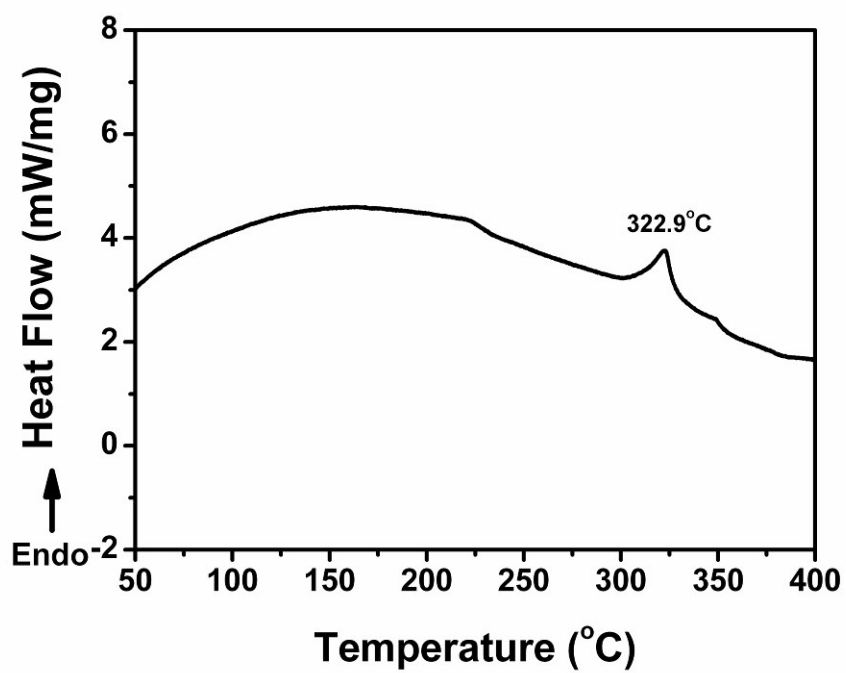

Fig. S3 DSC curve of DCBI (N<sub>2</sub>, 10 °C /min)

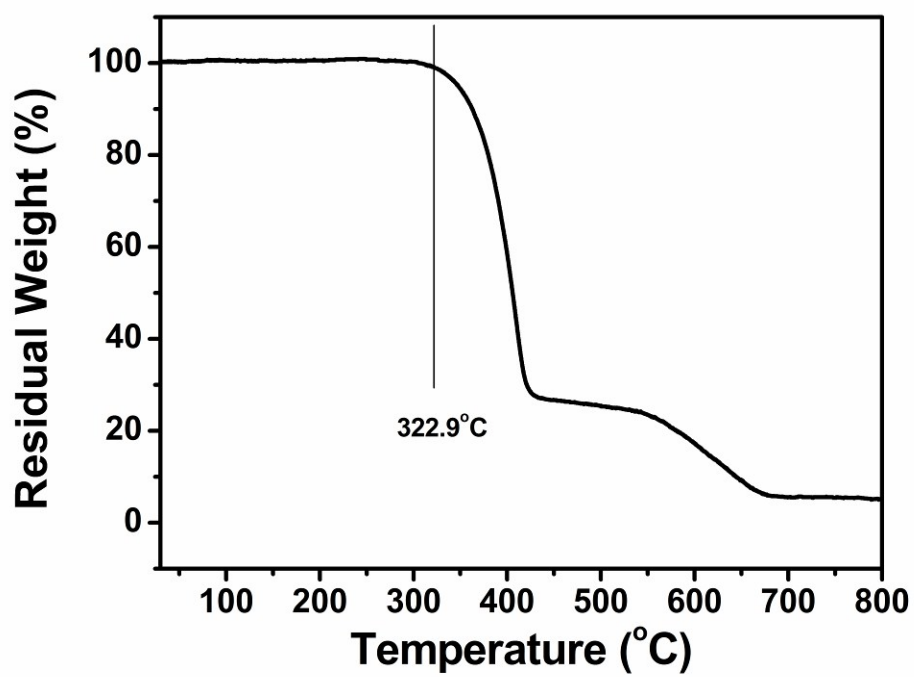

Fig. S4 TGA curve of DCBI (N<sub>2</sub>, 10 °C /min)

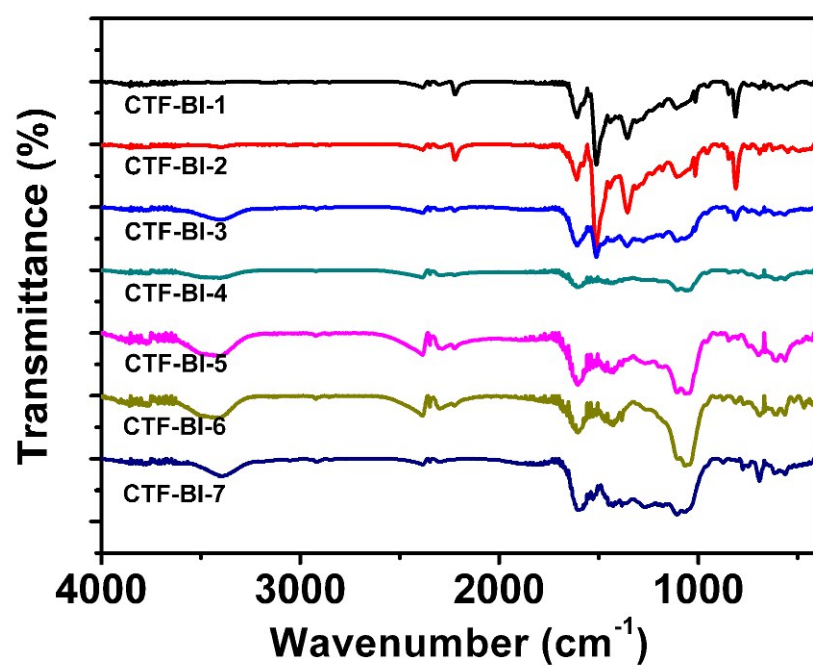

Fig. S5 FT-IR spectra of the CTF-BIs obtained from different ratios of ZnCl<sub>2</sub> to DCBI  
(KBr pellets)

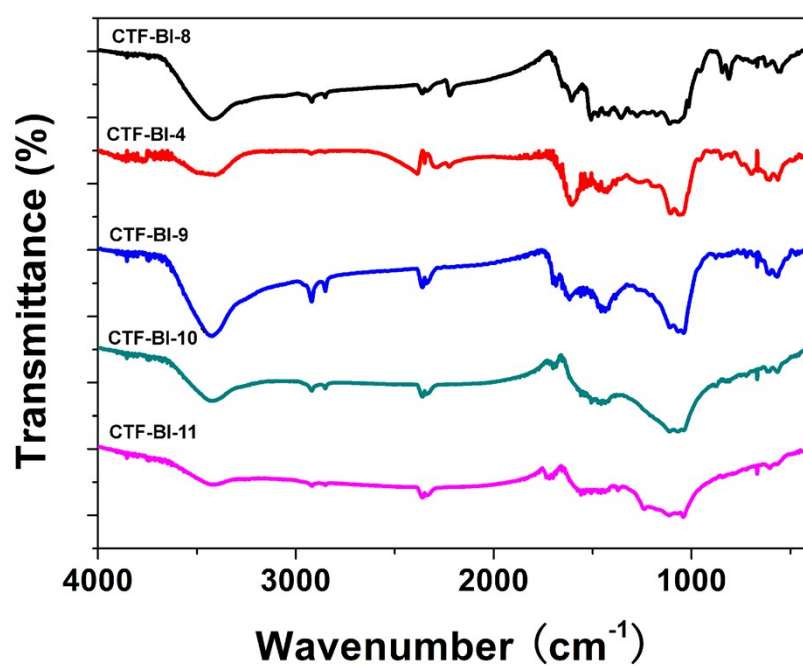

Fig S6 FT-IR spectra of the CTF-BIs obtained from different reaction temperatures.  
(KBr pellets)

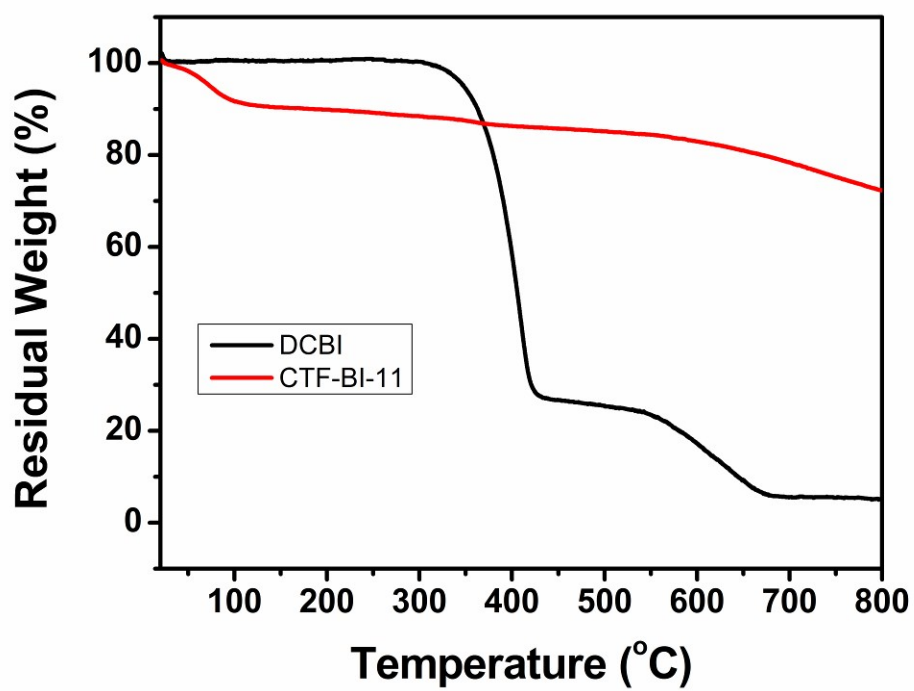

Fig. S7 TGA curve of DCBI and CTF-BI-11 (N<sub>2</sub>, 10 °C /min)



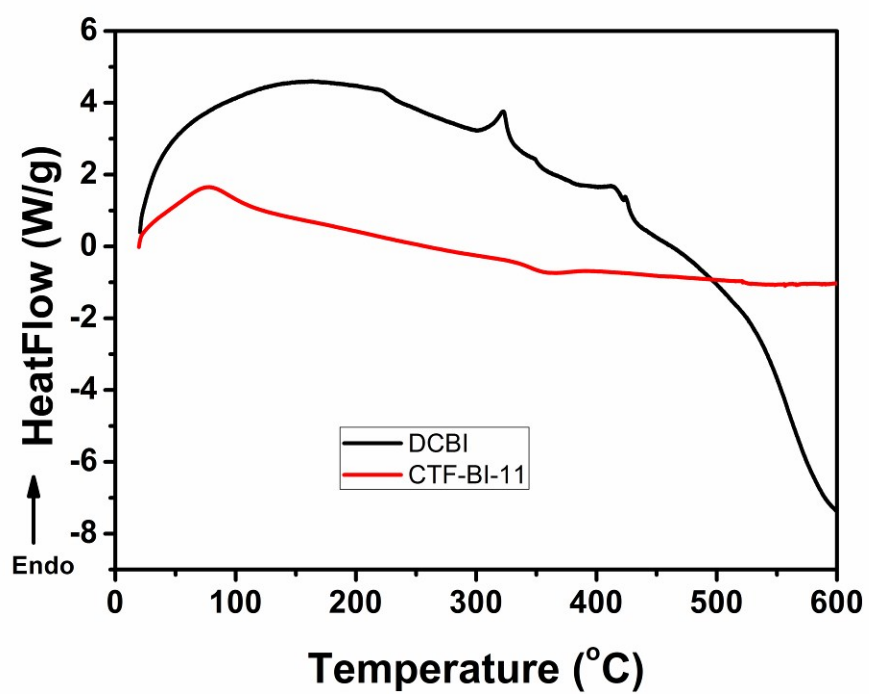

Fig. S8 DSC curves of DCBI and CTF-BI-11 (10 °C/min, N<sub>2</sub>)

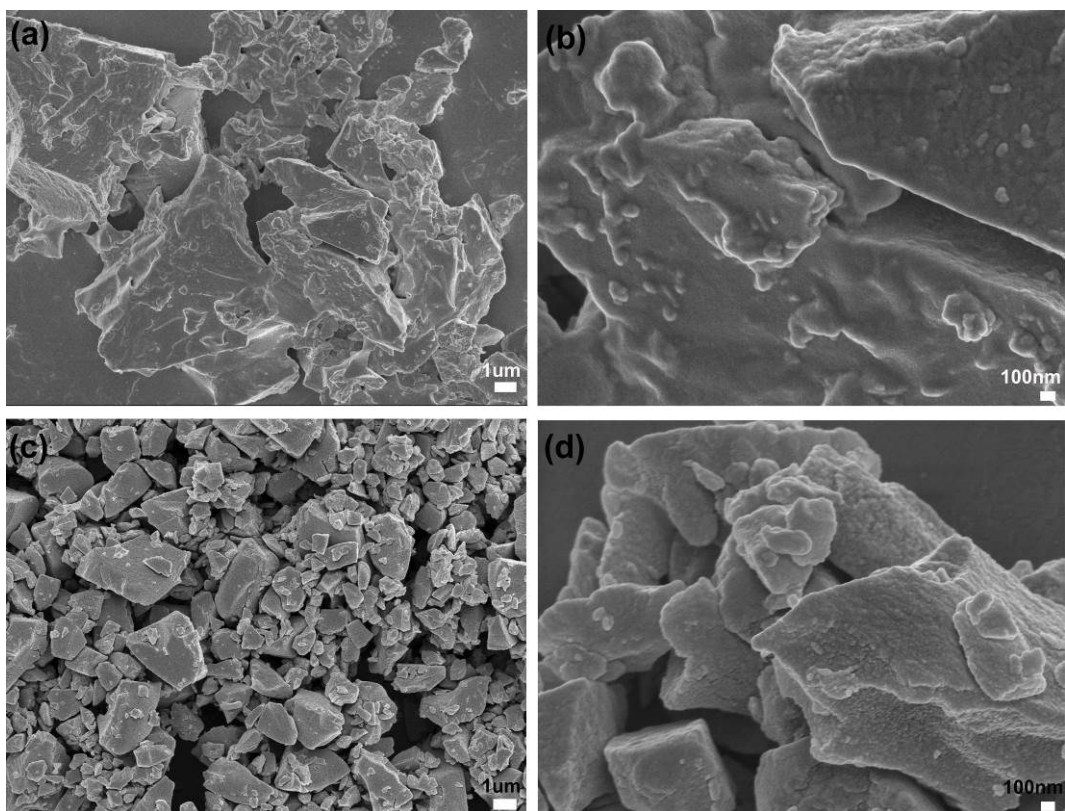

Fig. S9 FESEM images of CTF-BI-4 (a) and (b) and CTF-BI-11 (c) and (d)

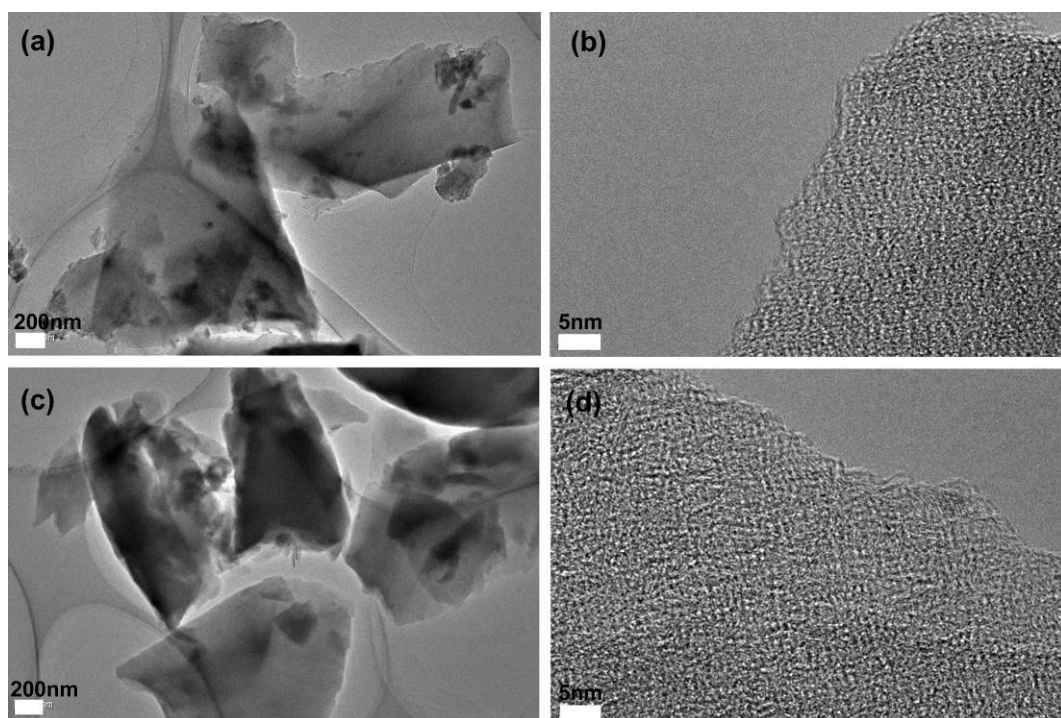

Fig. S10 TEM images of CTF-BI-4 (a) and (b) and CTF-BI-11 (c) and (d)

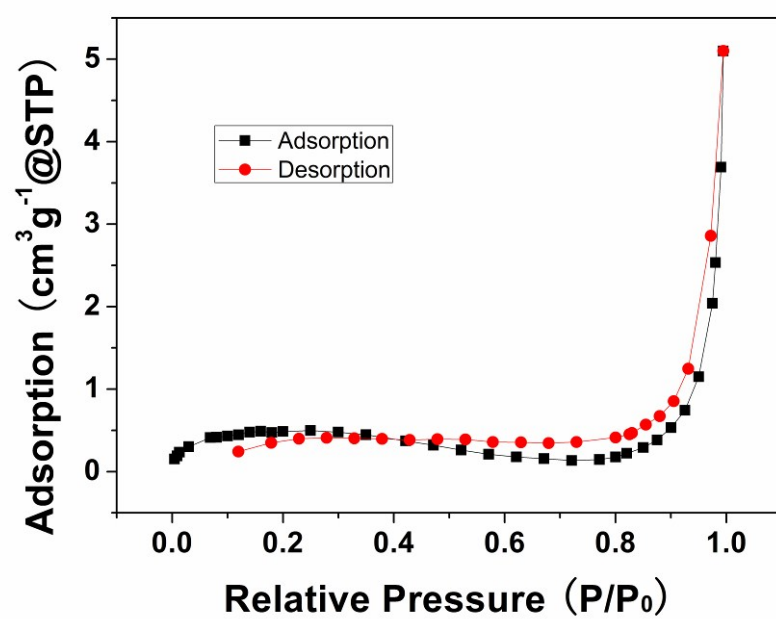

Fig. S11 Nitrogen adsorption and desorption isotherms at 77.3 K for CTF-BI-S

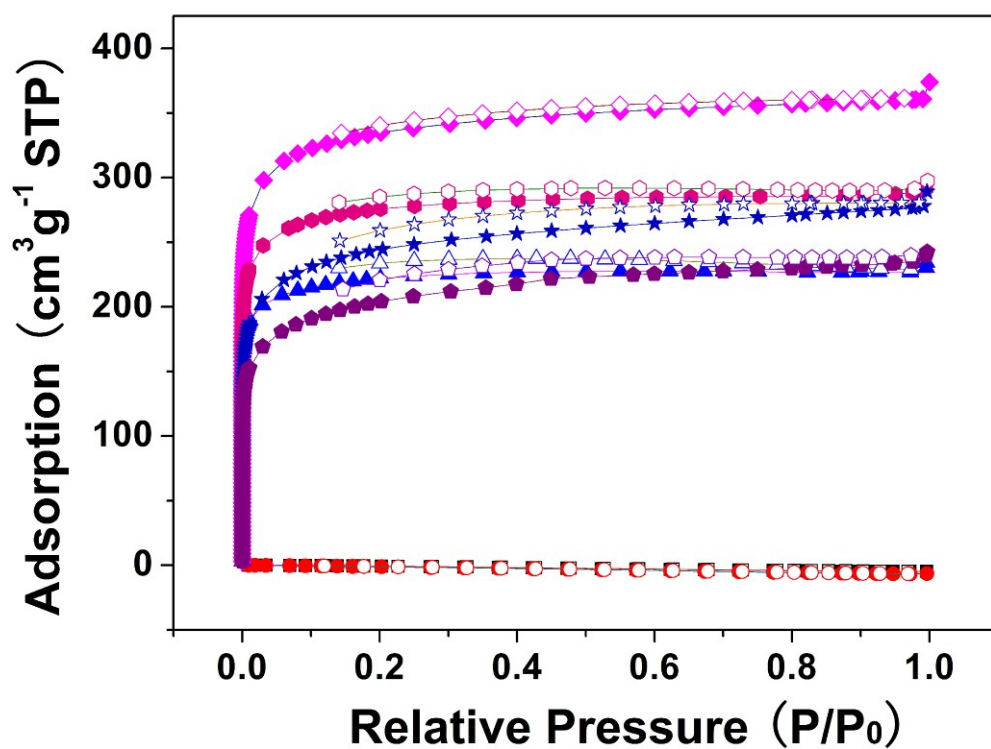

Fig. S12 Nitrogen adsorption and desorption isotherms at 77.3 K for all CTF-BIs derived from different ratios of ZnCl<sub>2</sub> to DCBI.

(Filled symbols for adsorption and Unfilled symbols for desorption. Square: CTF-BI-1; Circle: CTF-BI-2; Triangle: CTF-BI-3; Diamond: CTF-BI-4; Hexagon: CTF-BI-5; Star: CTF-BI-6; Pentagon: CTF-BI-7)

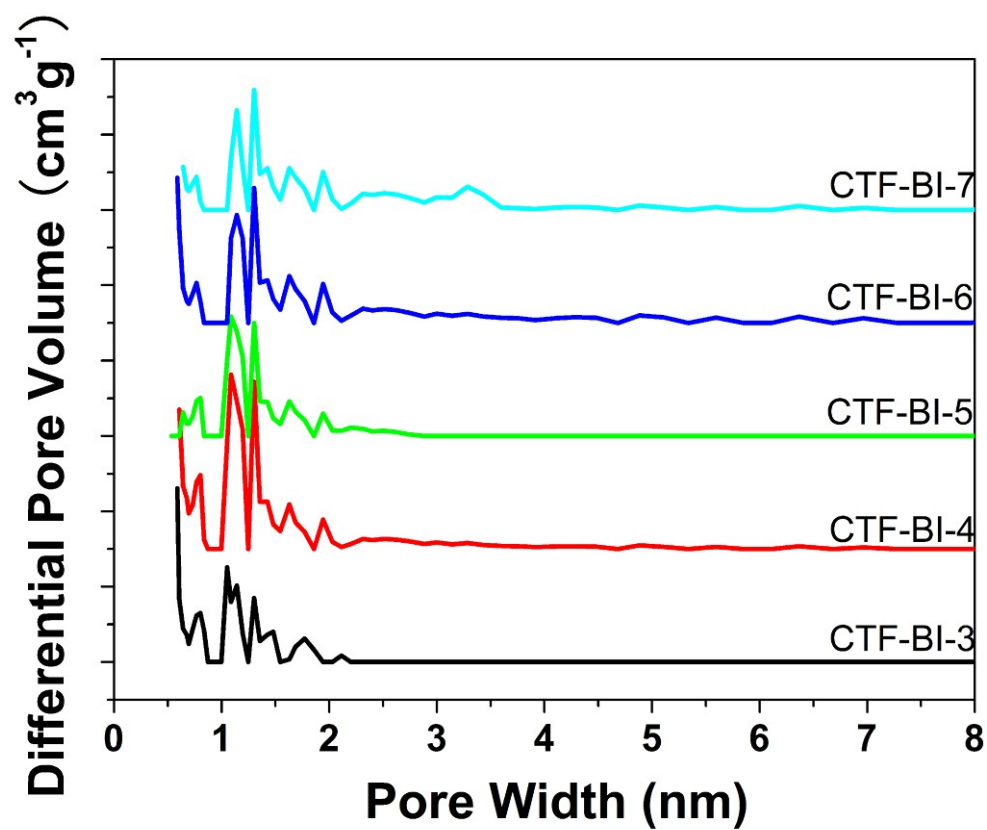

Fig. S13 Pore size distributions (PSD) calculated by the NLDFT method for all CTF-BIs derived from different ratios of  $\text{ZnCl}_2$  to DCBI

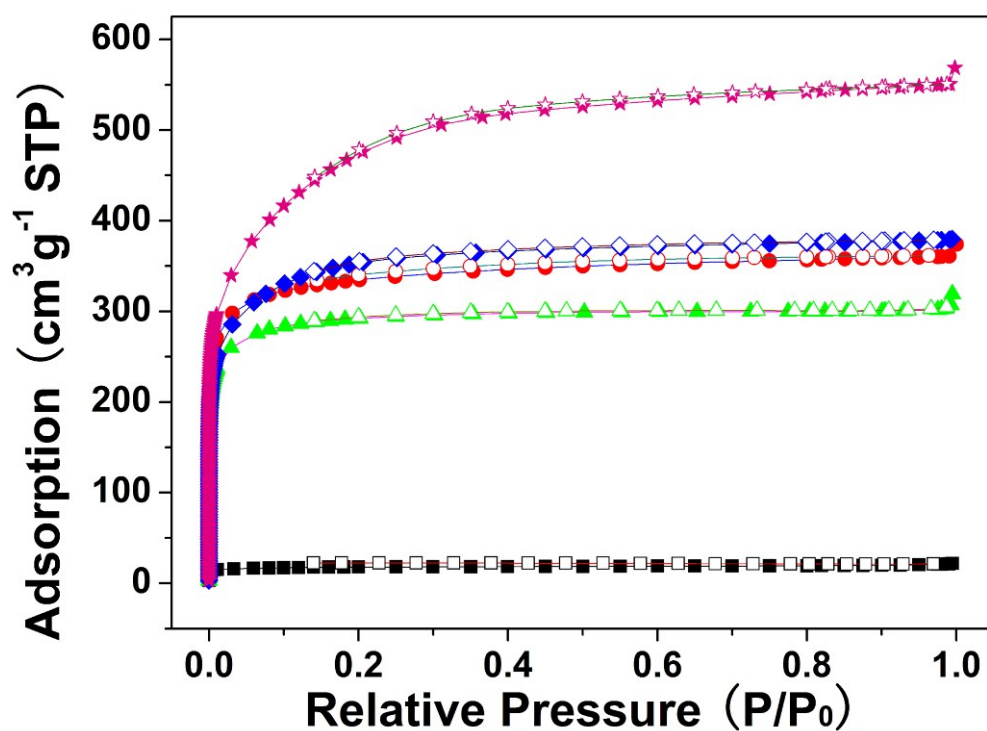

Fig. S14 Nitrogen adsorption and desorption isotherms at 77.3 K for all CTF-BIs  
obtained from different reaction temperatures

(Filled symbols for adsorption and Unfilled symbols for desorption. Square: CTF-BI-8; Circle: CTF-BI-4; Triangle: CTF-BI-9; Diamond: CTF-BI-10; Star: CTF-BI-11)

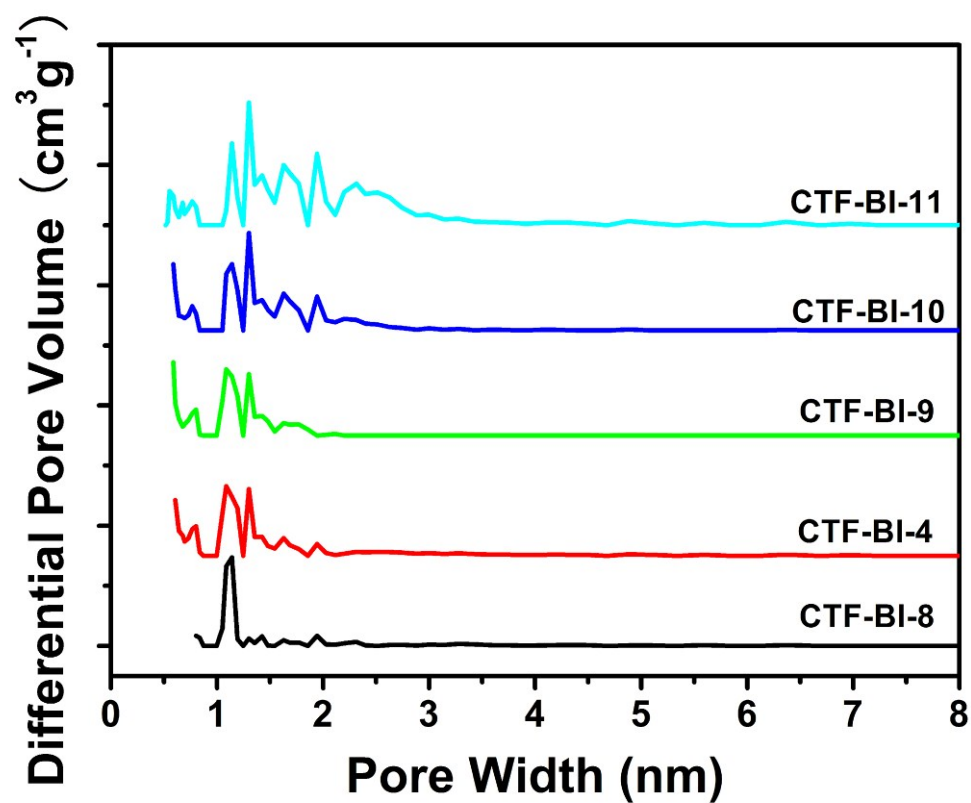

Fig. S15 Pore size distributions (PSD) calculated by the NLDFT method for all CTF-BIs obtained from different reaction temperatures



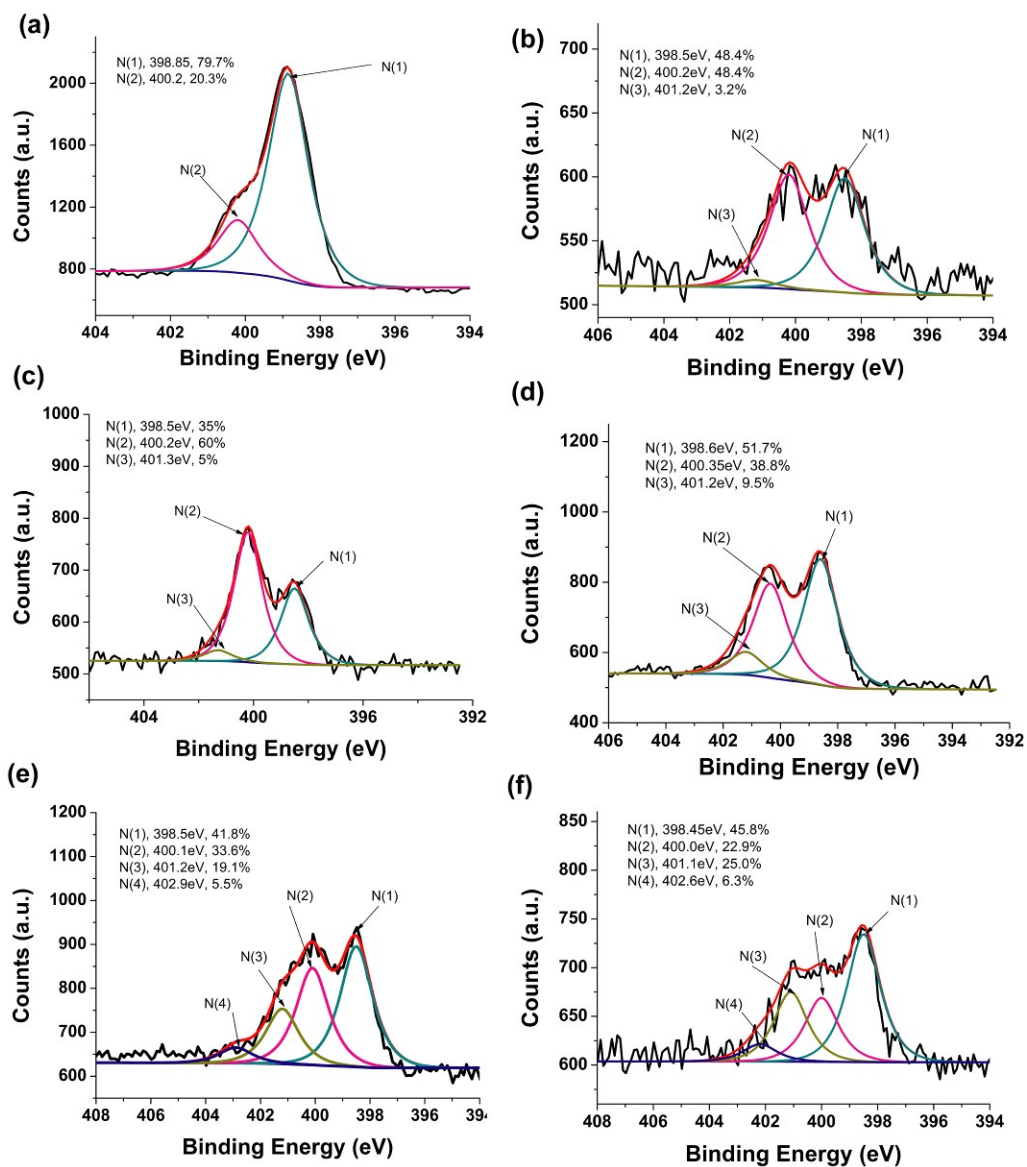

Fig. S16 High resolution N1s XPS spectra of (a) DCBI, (b) CTF-BI-8 (350 °C), (c) CTF-BI-4 (400 °C), (d) CTF-BI-9 (450 °C), (e) CTF-BI-10 (500 °C), and (f) CTF-BI-11 (550 °C)

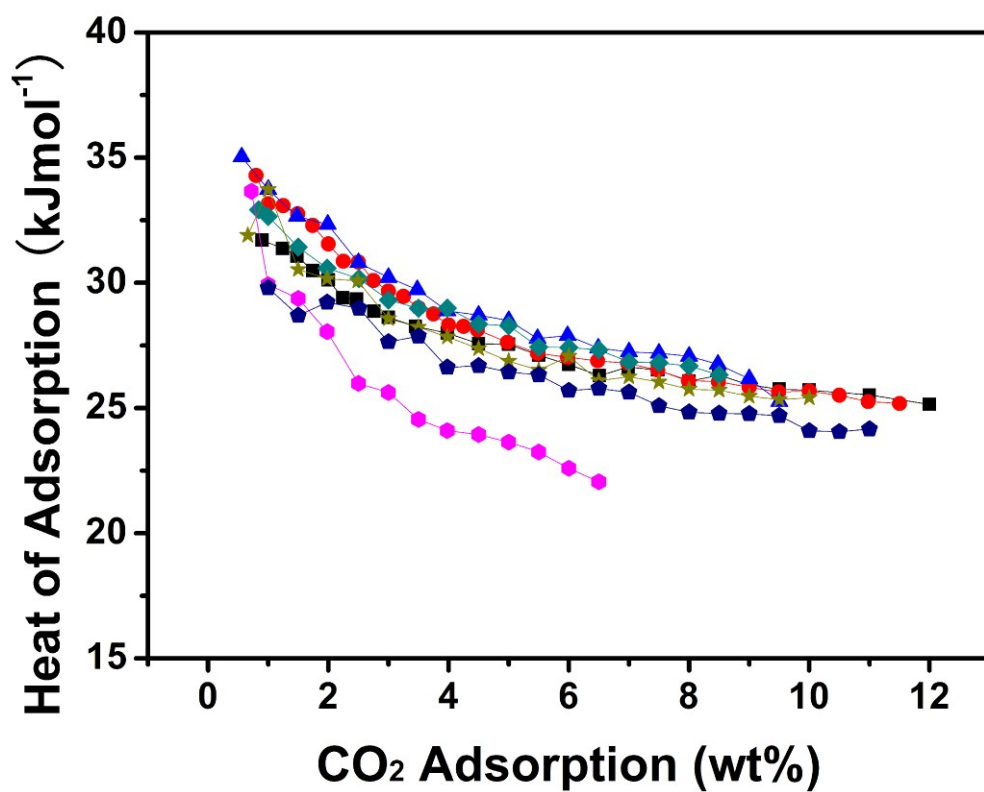

Fig. S17 Heats of Adsorption for the CTF-BIs  
(Square: CTF-BI-4; Circle: CTF-BI-11; Triangle: CTF-BI-3; Diamond: CTF-BI-6;  
Hexagon: CTF-BI-7; Star: CTF-BI-9; Pentagon: CTF-BI-10)

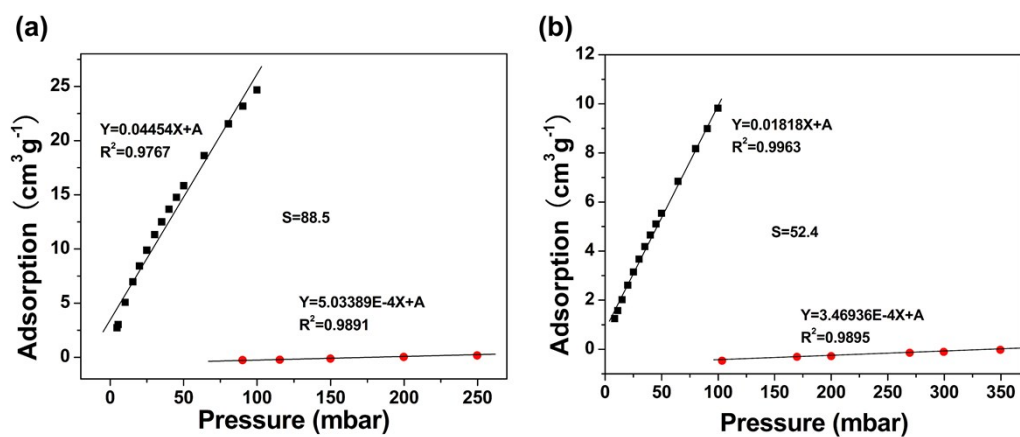

Fig. S18 CO<sub>2</sub>/N<sub>2</sub> selectivity for CTF-BI-3 at (a) 273 K and (b) 303 K, calculated using the Henry's Law constants in the linear low pressure range (0~100 mbar for CO<sub>2</sub> and 100~400 mbar for N<sub>2</sub>)

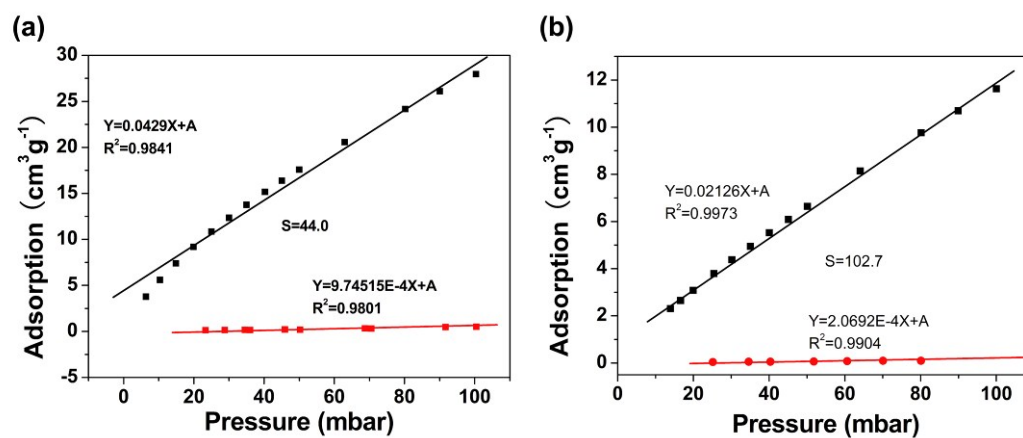

Fig. S19 CO<sub>2</sub>/N<sub>2</sub> selectivity for CTF-BI-4 at (a) 273 K and (b) 303 K, calculated using the Henry's Law constants in the linear low pressure range (0~100 mbar)

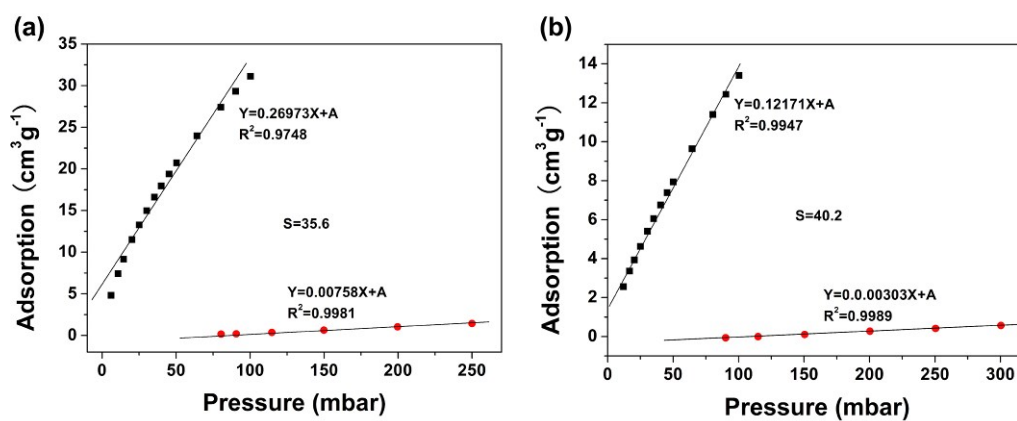

Fig. S20 CO<sub>2</sub>/N<sub>2</sub> selectivity for CTF-BI-5 at (a) 273 K and (b) 303 K, calculated using the Henry's Law constants in the linear low pressure range (0~100 mbar for CO<sub>2</sub> and 50~300 mbar for N<sub>2</sub>)

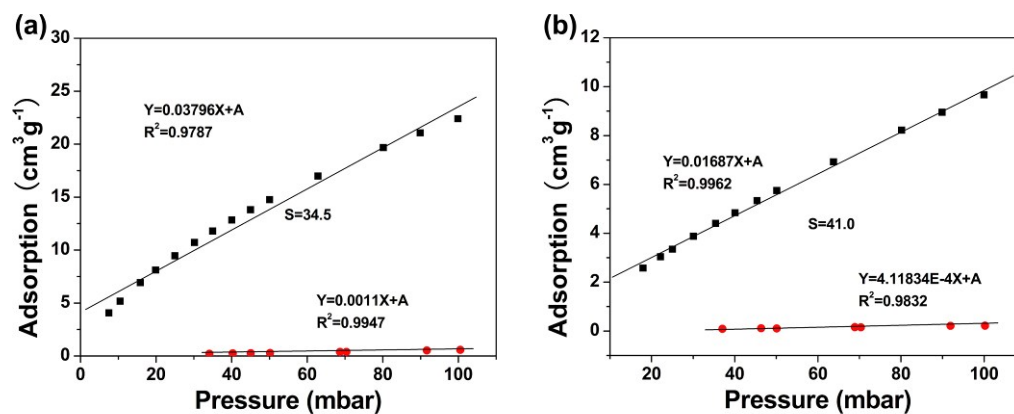

Fig. S21 CO<sub>2</sub>/N<sub>2</sub> selectivity for CTF-BI-6 at (a) 273 K and (b) 303 K, calculated using the Henry's Law constants in the linear low pressure range (0~100 mbar)

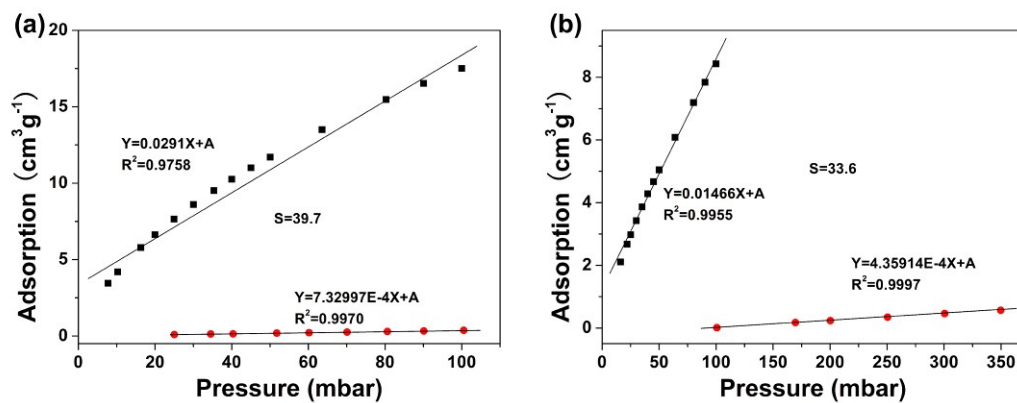

Fig. S22 CO<sub>2</sub>/N<sub>2</sub> selectivity for CTF-BI-7 at (a) 273 K and (b) 303 K, calculated using the Henry's Law constants in the linear low pressure range (0~100 mbar for CO<sub>2</sub> and 100~350 mbar for N<sub>2</sub> at 303 K)

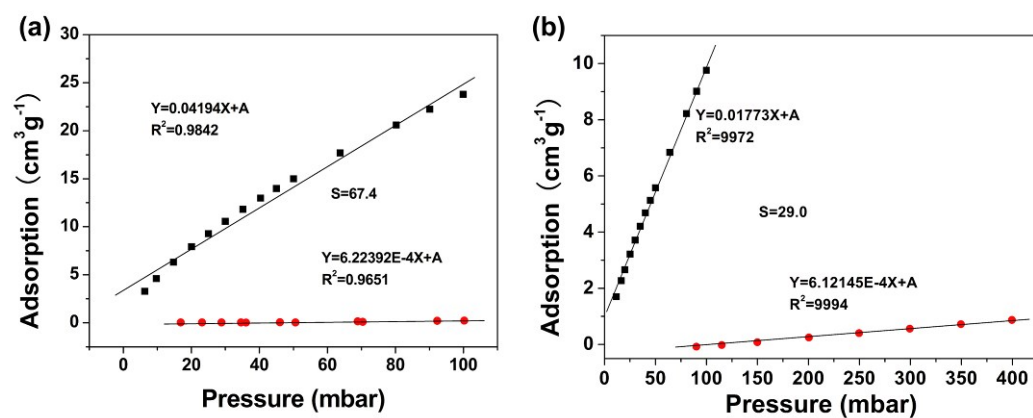

Fig. S23 CO<sub>2</sub>/N<sub>2</sub> selectivity for CTF-BI-9 at (a) 273 K and (b) 303 K, calculated using the Henry's Law constants in the linear low pressure range (0~100 mbar for CO<sub>2</sub> and 100~400 mbar for N<sub>2</sub> at 303 K)



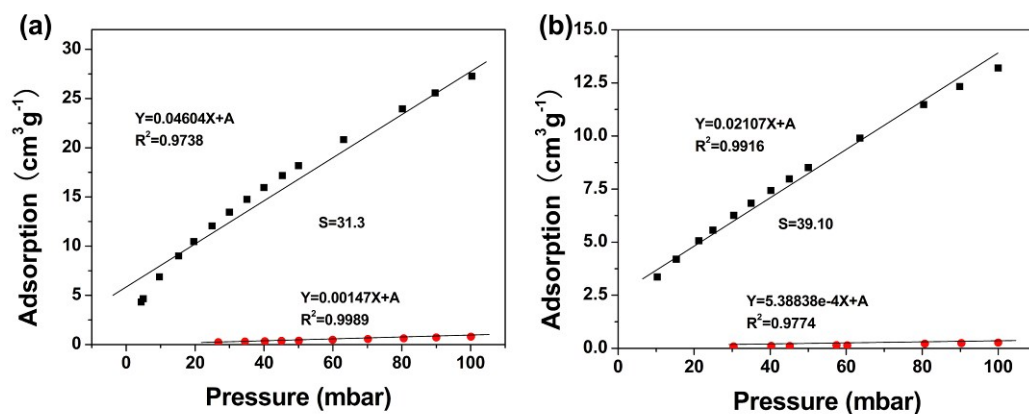

Fig. S24 CO<sub>2</sub>/N<sub>2</sub> selectivity for CTF-BI-10 at (a) 273 K and (b) 303 K, calculated using the Henry's Law constants in the linear low pressure range (0~100 mbar)

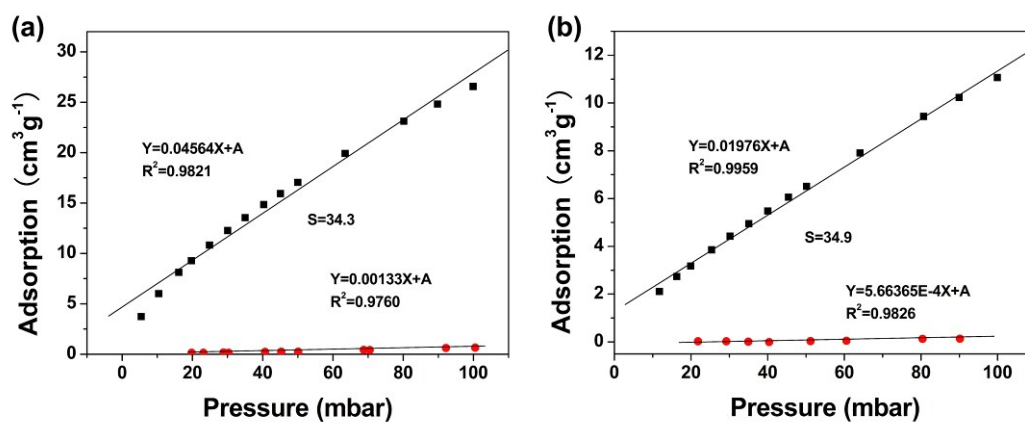

Fig. S25 CO<sub>2</sub>/N<sub>2</sub> selectivity for CTF-BI-11 at (a) 273 K and (b) 303 K, calculated using the Henry's Law constants in the linear low pressure range (0~100 mbar)

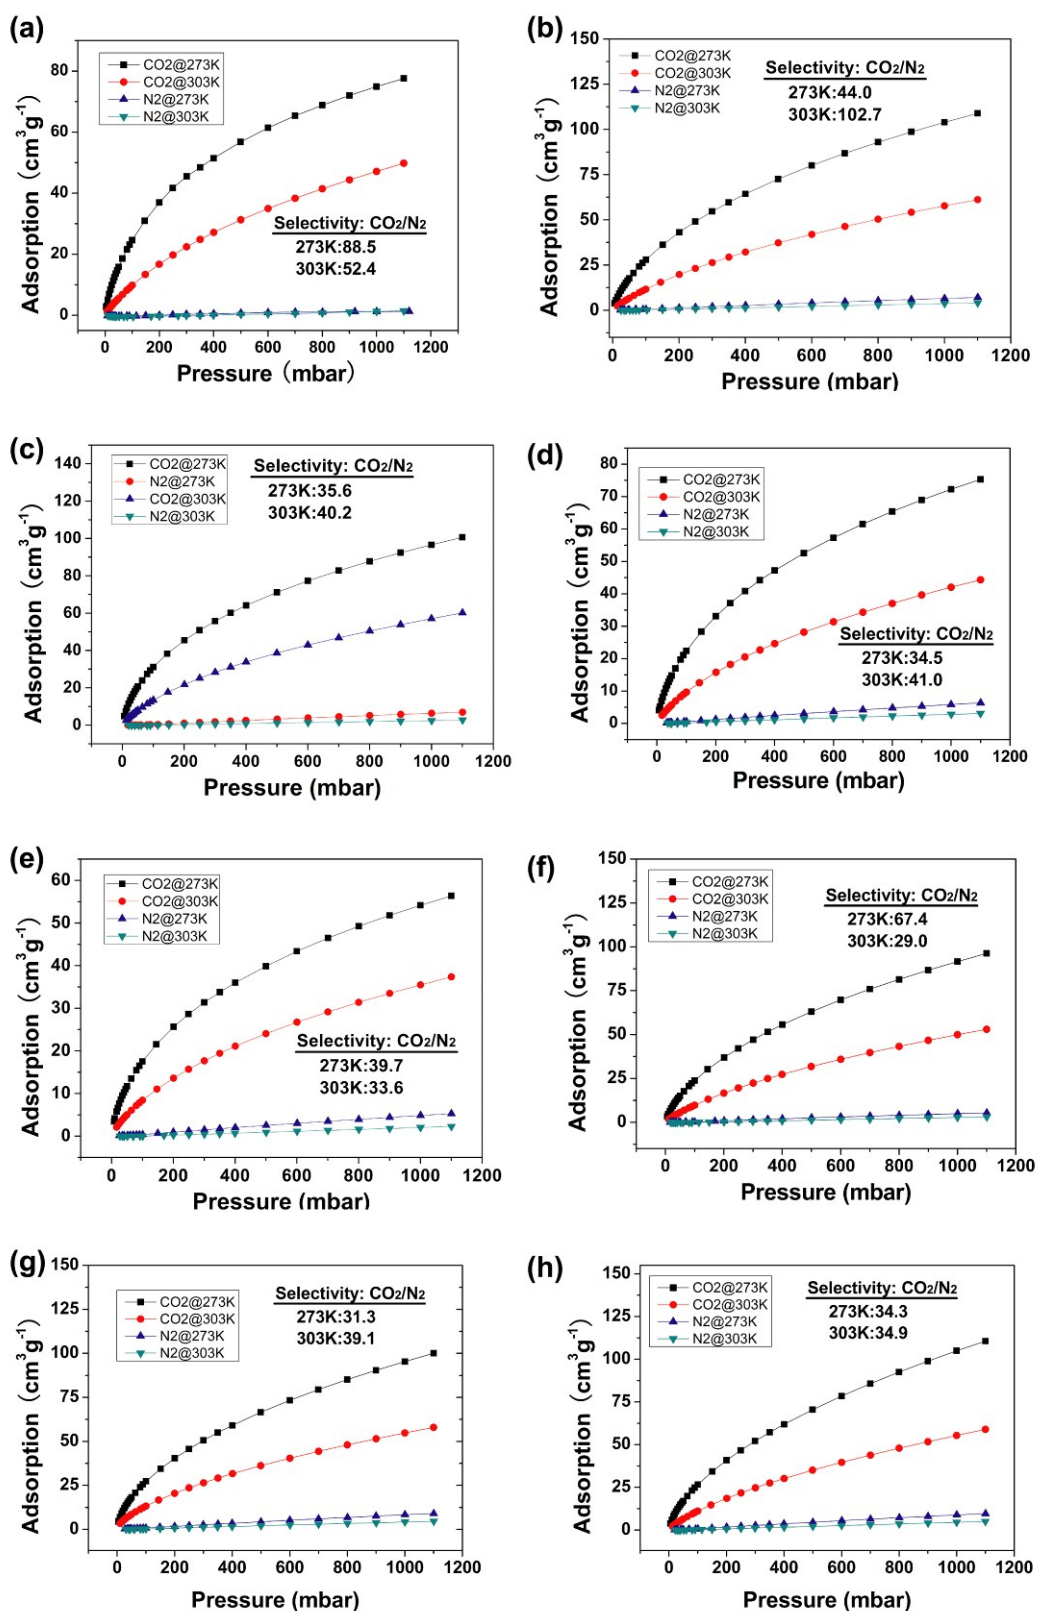

Fig. S26 CO<sub>2</sub>/N<sub>2</sub> selectivities for (a) CTF-BI-3, (b) CTF-BI-4, (c) CTF-BI-5, (d) CTF-BI-6, (e) CTF-BI-7, (f) CTF-BI-9, (g) CTF-BI-10, and (h) CTF-BI-11, calculated using the Henry's Law constants in the linear low pressure range.

Table S1 Elemental Analysis of the CTF-BIs

| Code       | N (%) | C (%) | H (%) |
|------------|-------|-------|-------|
| Calculated | 22.94 | 73.76 | 3.30  |
| CTF-BI-8   | 16.18 | 63.03 | 3.419 |
| CTF-BI-4   | 14.72 | 65.94 | 3.884 |
| CTF-BI-9   | 12.11 | 55.83 | 3.376 |
| CTF-BI-10  | 11.63 | 68.71 | 2.385 |
| CTF-BI-11  | 10.95 | 58.87 | 2.779 |
